# Supplementary material for: Exploring the gut microbiome and serum metabolome interplay in non-functioning pituitary neuroendocrine tumors
Source: Front Microbiol. 2025 Apr 1;16:1541683. doi: 10.3389/fmicb.2025.1541683 (PMC11997625; doi:10.3389/fmicb.2025.1541683)
Supplement: Supplementary file 9 [file Table_1.XLSX]

## Sheet: Sheet1
Supplementary Table 1 Clinical parameters of NF-PitNET patients
No	Age(years)	Gender(1-male, 2-female)	BMI(kg/m^2)	Course of disease(months)	Headache(0-no, 1-yes)	Disturbances in vision(0-no, 1-yes)	Pituitary dysfunction(0-no, 1-yes)	Knosp grade	Tumor size(mm^3)	Aggressive(0-no, 1-yes)	Pituitary apoplexy(0-no, 1-yes)	P53(0-no, 1-yes)	Ki67（%）
NF-PitNET01	78	2	23.4	6	0	1	0	4	18900	1	1	0	2
NF-PitNET02	33	2	18.4	12	1	1	0	4	16767	1	0	0	5
NF-PitNET03	58	1	25.7	24	1	0	0	1	6783	0	0	0	3
NF-PitNET04	68	1	28.1	1	0	0	0	4	20925	1	1	0	2
NF-PitNET05	62	2	25.3	60	0	1	0	4	54880	1	0	0	2
NF-PitNET06	47	2	24	204	1	0	0	3	5508	1	0	0	5
NF-PitNET07	50	2	26	72	1	1	0	3	11780	0	0	0	2
NF-PitNET08	59	2	23.9	24	1	0	0	1	7935	1	1	0	1
NF-PitNET09	58	2	22.6	1	0	0	0	3	1080	1	0	1	2
NF-PitNET10	50	1	26.5	12	0	1	0	1	3808	1	1	1	2
NF-PitNET11	53	1	27.7	2	0	1	0	2	9072	0	0	0	2
NF-PitNET12	71	2	21.1	12	0	1	0	2	4368	0	1	0	2
NF-PitNET13	61	1	25.9	180	0	1	0	4	9200	1	0	1	1
NF-PitNET14	35	1	27.3	60	1	0	0	2	8694	0	1	1	3
NF-PitNET15	73	1	26.7	24	0	1	0	1	3840	0	0	0	2
NF-PitNET16	63	2	22.8	1	0	0	0	4	12236	1	0	0	3
NF-PitNET17	69	1	26	12	0	0	1	4	5304	1	0	0	2
NF-PitNET18	56	1	23.7	1	1	0	0	4	17864	1	0	0	5
NF-PitNET19	50	2	22.6	48	1	0	0	2	1521	0	0	0	4
NF-PitNET20	40	2	22.9	8	0	1	1	2	2860	0	1	1	3
NF-PitNET21	76	1	24.1	18	0	0	1	2	14000	0	0	0	3
NF-PitNET22	54	1	31.4	24	1	1	0	3	17762	1	1	1	4
NF-PitNET23	58	1	23.4	24	1	1	0	3	5700	1	0	0	3
BMI: body mass index
