# Supplementary material for: Exploring the gut microbiome and serum metabolome interplay in non-functioning pituitary neuroendocrine tumors
Source: Front Microbiol. 2025 Apr 1;16:1541683. doi: 10.3389/fmicb.2025.1541683 (PMC11997625; doi:10.3389/fmicb.2025.1541683)
Supplement: Supplementary file 10 [file Table_2.XLSX]

## Sheet: Sheet1
Supplementary Table 2 Clinical parameters of healthy controls
No	Age(years)	Gender(1-male, 2-female)	Height(cm)	Weight(kg)	BMI(kg/m^2)
HC01	52	2	160	56	21.8
HC02	39	2	158	55	22
HC03	63	2	162	55	20.9
HC04	41	1	183	86	25.6
HC05	61	1	178	78	24.6
HC06	58	2	161	55	21.2
HC07	47	2	169	60	21
HC08	64	2	166	66	23.9
HC09	64	2	160	60	23.4
HC10	34	2	167	66	23.6
HC11	56	2	163	60	22.5
HC12	48	2	162	62	23.6
HC13	57	1	164	57	21.1
HC14	57	1	168	68	24
HC15	39	2	165	65	23.8
HC16	53	2	158	67	26.8
HC17	38	2	152	48	20.7
HC18	49	1	174	65	21.4
HC19	52	2	166	78	28.3
HC20	53	1	175	90	29.3
HC21	58	2	163	44	16.5
HC22	60	2	157	65	26.3
HC23	57	2	156	58	23.8
HC24	57	2	158	53	21.2
HC25	50	2	160	63	24.6
HC26	68	1	168	75	26.5
HC27	52	2	156	52	21.3
HC28	49	2	170	63	21.7
HC29	72	2	159	65	25.7
HC30	59	1	175	73	23.8
BMI: body mass index
